# Supplementary material
Source: publisher figshare collection journal article supplement (https://tandf.figshare.com/ndownloader/files/24713599)
Supplement: Supplementary file 1 [file 24713599]

From Wu et al, 2005.


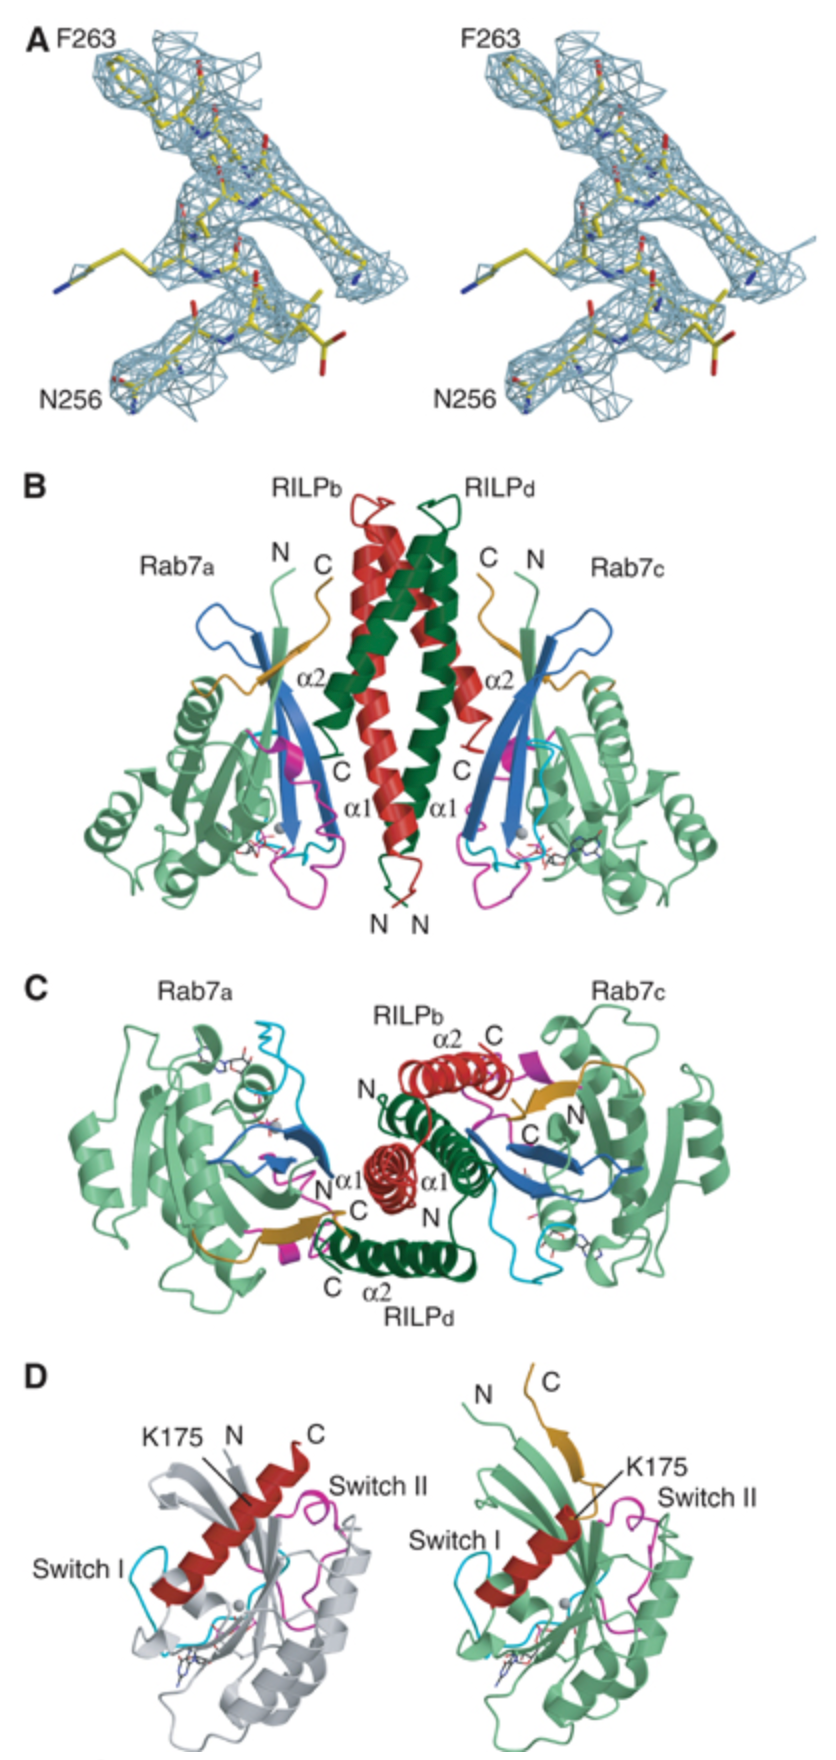


C

D

E

F

**Figure S4.** Portions of the Rab7 and RILP alignments and structural map of the binding interface between Rab7 and RILP. A. The C-terminal hypervariable domain (HVD) of Rab7 coding sequences and amino acid alignment. Arrow denotes key amino acid with differential PTMs, as found in Wyroba *et al*. ([16](#_ENREF_16), 17) B. Alignment of the conserved region of the RILP protein sequences. Arrows denote the 17 highly conserved amino acids used in analysis for Table 1. C-F. Structures of Rab7 and RILP dimers to illustrate the binding interface. From reference (28), Wu *et al*, 2005, The EMBO Journal.
